## Multi-ancestry genome-wide gene-sleep interactions identify novel loci for blood pressure

Heming Wang<sup>1,2,\*</sup>, Raymond Noordam<sup>3,\*</sup>, Brian E Cade<sup>1,2,\*</sup>, Karen Schwander<sup>4,\*</sup>, Thomas W Winkler<sup>5,\*</sup>, Jiwon Lee<sup>1,\*</sup>, Yun Ju Sung<sup>4,\*</sup>, Amy R. Bentley<sup>6,\*</sup>, Alisa K Manning<sup>2,7</sup>, Hugues Aschard<sup>8,9</sup>, Tuomas O Kilpeläinen<sup>10,11</sup>, Marjan Ilkov<sup>12</sup>, Michael R Brown<sup>13</sup>, Andrea R Horimoto<sup>14</sup>, Melissa Richard<sup>15</sup>, Traci M Bartz<sup>16</sup>, Dina Vojinovic<sup>17,18</sup>, Elise Lim<sup>19</sup>, Jovia L Nierenberg<sup>20</sup>, Yongmei Liu<sup>21</sup>, Kumaraswamynaidu Chitrala<sup>22</sup>, Tuomo Rankinen<sup>23</sup>, Solomon K Musani<sup>24</sup>, Nora Franceschini<sup>25</sup>, Rainer Rauramaa<sup>26</sup>, Maris Alver<sup>27,28</sup>, Phyllis Zee<sup>29</sup>, Sarah E Harris<sup>30</sup>, Peter J van der Most<sup>31</sup>, Ilja M Nolte<sup>31</sup>, Patricia B Munroe<sup>32,33</sup>, Nicholette D Palmer<sup>34</sup>, Brigitte Kühnel<sup>35,36</sup>, Stefan Weiss<sup>37,38</sup>, Wanqing Wen<sup>39</sup>, Kelly A Hall<sup>40</sup>, Leo-Pekka Lyytikäinen<sup>41,42</sup>, Jeff O'Connell<sup>43,44</sup>, Gudny Eiriksdottir<sup>12</sup>, Lenore J Launer<sup>22</sup>, Paul S de Vries<sup>13</sup>, Dan E Arking<sup>45</sup>, Han Chen<sup>13,46</sup>, Eric Boerwinkle<sup>13,47</sup>, Jose E Krieger<sup>14</sup>, Pamela J Schreiner<sup>48</sup>, Stephen S Sidney<sup>49</sup>, James M Shikany<sup>50</sup>, Kenneth Rice<sup>51</sup>, Yii-Der Ida Chen<sup>52</sup>, Sina A Gharib<sup>53</sup>, Joshua C Bis<sup>54</sup>, Annemarie I Luik<sup>17</sup>, M Arfan Ikram<sup>17,55</sup>, André G Uitterlinden<sup>17</sup>, Najaf Amin<sup>17</sup>, Hanfei Xu<sup>19</sup>, Daniel Levy<sup>19,56</sup>, Jiang He<sup>20</sup>, Kurt K Lohman<sup>21</sup>, Alan B Zonderman<sup>22</sup>, Treva K Rice<sup>4</sup>, Mario Sims<sup>24</sup>, Gregory Wilson<sup>57</sup>, Tamar Sofer<sup>1,2</sup>, Stephen S Rich<sup>58</sup>, Walter Palmas<sup>59</sup>, Jie Yao<sup>52</sup>, Xiuqing Guo<sup>52</sup>, Jerome I Rotter<sup>52</sup>, Nienke R Biermasz<sup>60</sup>, Dennis O Mook-Kanamori<sup>61,62</sup>, Lisa W Martin<sup>63</sup>, Ana Barac<sup>64</sup>, Robert B Wallace<sup>65</sup>, Daniel Gottlieb<sup>1</sup>, Pirjo Komulainen<sup>26</sup>, Sami Heikkinen<sup>66,67</sup>, Reedik Mägi<sup>27</sup>, Lili Milani<sup>27</sup>, Andres Metspalu<sup>27</sup>, John M Starr<sup>68</sup>, Yuri Milaneschi<sup>69</sup>, RJ Waken<sup>70</sup>, Chuan Gao<sup>71</sup>, Melanie Waldenberger<sup>35,36</sup>, Annette Peters<sup>36,72</sup>, Konstantin Strauch<sup>73,74</sup>, Thomas Meitinger<sup>75</sup>, Till Roenneberg<sup>76</sup>, Uwe Völker<sup>37,38</sup>, Marcus Dörr<sup>38,77</sup>, Xiao-Ou Shu<sup>39</sup>, Sutapa Mukherjee<sup>78,79</sup>, David R Hillman<sup>80</sup>, Mika Kähönen<sup>42,81</sup>, Lynne E Wagenknecht<sup>82</sup>, Christian Gieger<sup>35,83</sup>, Hans J Grabe<sup>84</sup>, Wei Zheng<sup>39</sup>, Lyle J Palmer<sup>40</sup>, Terho Lehtimäki<sup>41,42</sup>, Vilmondur Gudnason<sup>12,85</sup>, Alanna C Morrison<sup>13</sup>, Alexandre C Pereira<sup>14,86</sup>, Myriam Fornage<sup>13,15</sup>, Bruce M Psaty<sup>87,88</sup>, Cornelia M van Duijn<sup>17,89</sup>, Ching-Ti Liu<sup>19</sup>, Tanika N Kelly<sup>20</sup>, Michele K Evans<sup>22</sup>, Claude Bouchard<sup>23</sup>, Ervin R Fox<sup>24</sup>, Charles Kooperberg<sup>90</sup>, Xiaofeng Zhu<sup>91</sup>, Timo A Lakka<sup>26,66,92</sup>, Tõnu Esko<sup>27</sup>, Kari E North<sup>25</sup>, Ian J Deary<sup>30</sup>, Harold Snieder<sup>31</sup>, Brenda WJH Penninx<sup>69</sup>, James Gauderman<sup>93</sup>, Dabeeru C Rao<sup>4,#</sup>, Susan Redline<sup>1,94,#</sup>, Diana van Heemst<sup>3,#</sup>

1. Division of Sleep and Circadian Disorders, Brigham and Women's Hospital, Harvard Medical School, Boston, MA 02115, USA.
2. Program in Medical and Population Genetics, Broad Institute, Cambridge, Massachusetts, USA.
3. Department of Internal Medicine, Section of Gerontology and Geriatrics, Leiden University Medical Center, Leiden 2333ZA, The Netherlands.
4. Division of Biostatistics, Washington University School of Medicine, St. Louis, MO 63110, USA.
5. Department of Genetic Epidemiology, University of Regensburg, Regensburg, Germany.
6. Center for Research on Genomics and Global Health, National Human Genome Research Institute, National Institutes of Health, Bethesda, MD 20892, USA.
7. Clinical and Translational Epidemiology Unit, Massachusetts General Hospital, Harvard Medical School, Boston, Massachusetts, USA.
8. Department of Epidemiology, Harvard School of Public Health, Boston, Massachusetts, USA.
9. Centre de Bioinformatique, Biostatistique et Biologie Intégrative (C3BI), Institut Pasteur, Paris, France.
10. Novo Nordisk Foundation Center for Basic Metabolic Research, Faculty of Health and Medical Sciences, University of Copenhagen, Copenhagen 2200, Denmark.
11. Department of Environmental Medicine and Public Health, The Icahn School of Medicine at Mount Sinai, New York, New York, USA.
12. Icelandic Heart Association, Kopavogur 201, Iceland.
13. Human Genetics Center, Department of Epidemiology, Human Genetics, and Environmental Sciences, School of Public Health, The University of Texas Health Science Center at Houston, Houston, TX 77030, USA.
14. Laboratory of Genetics and Molecular Cardiology, Heart Institute (InCor), University of São Paulo Medical School, São Paulo 5403000, Brazil.
15. Brown Foundation Institute of Molecular Medicine, McGovern Medical School, University of Texas Health Science Center at Houston, Houston, TX, USA.
16. Cardiovascular Health Research Unit, Departments of Biostatistics and Medicine, University of Washington, Seattle, WA 98101, USA.
17. Department of Epidemiology, Erasmus MC, University Medical Center, Rotterdam, The Netherlands.
18. Molecular Epidemiology, Department of Biomedical Data Sciences, Leiden University Medical Center, Leiden, the Netherlands.
19. Department of Biostatistics, Boston University School of Public Health, Boston, MA 02118, USA.
20. Department of Epidemiology, Tulane University School of Public Health and Tropical Medicine, New Orleans, LA 70112 USA
21. Division of Cardiology, Department of Medicine, Duke Molecular Physiology Institute Duke University School of Medicine, Durham, NC 27701, USA.
22. Laboratory of Epidemiology and Population Sciences, National Institute on Aging, National Institutes of Health, Baltimore, Maryland 21224, USA.
23. Human Genomics Laboratory, Pennington Biomedical Research Center, Baton Rouge, LA 70808, USA.
24. Department of Medicine, University of Mississippi Medical Center, Jackson, MS 39213, USA.

25. Department of Epidemiology, Gillings School of Global Public Health, University of North Carolina, Chapel Hill, NC 27516, USA.
26. Foundation for Research in Health Exercise and Nutrition, Kuopio Research Institute of Exercise Medicine, Kuopio, 70100, Finland
27. Estonian Genome Center, Institute of Genomics, University of Tartu, Tartu 51010, Estonia.
28. Department of Genetic Medicine and Development, University of Geneva, Geneva 1211, Switzerland.
29. Department of Neurology, Northwestern University, Chicago, IL, USA.
30. Lothian Birth Cohorts group, Department of Psychology, University of Edinburgh, Edinburgh, EH8 9JZ, UK.
31. Department of Epidemiology, University of Groningen, University Medical Center Groningen, Groningen 9713 GZ, The Netherlands.
32. Clinical Pharmacology, William Harvey Research Institute, Barts and The London School of Medicine and Dentistry, Queen Mary University of London, London EC1M 6BQ, UK.
33. National Institute for Health Research Barts Cardiovascular Biomedical Research Unit, Queen Mary University of London, London, London EC1M 6BQ, UK.
34. Biochemistry, Wake Forest School of Medicine, Winston-Salem, NC 27157, USA.
35. Research Unit of Molecular Epidemiology, Helmholtz Zentrum München, German Research Center for Environmental Health, Neuherberg 85764, Germany.
36. Institute of Epidemiology, Helmholtz Zentrum München, German Research Center for Environmental Health, Neuherberg 85764, Germany.
37. Interfaculty Institute for Genetics and Functional Genomics, Department of Functional Genomics, University Medicine Greifswald, Greifswald 17489, Germany.
38. German Center for Cardiovascular Research (DZHK), partner site Greifswald, Greifswald 17475, Germany.
39. Division of Epidemiology, Department of Medicine, Vanderbilt University School of Medicine, Nashville, TN 37203, USA.
40. School of Public Health, The University of Adelaide, Adelaide, South Australia 5005, Australia.
41. Department of Clinical Chemistry, Fimlab Laboratories, Tampere 33520, Finland.
42. Department of Clinical Chemistry, Finnish Cardiovascular Research Center - Tampere, Faculty of Medicine and Health Technology, Tampere University, Tampere 33014, Finland
43. Division of Endocrinology, Diabetes, and Nutrition, University of Maryland School of Medicine, Baltimore, MD, USA.
44. Program for Personalized and Genomic Medicine, University of Maryland School of Medicine, Baltimore, MD, USA.
45. McKusick-Nathans Institute of Genetic Medicine, Johns Hopkins University School of Medicine, Baltimore, MD 21205, USA.
46. Center for Precision Health, School of Public Health & School of Biomedical Informatics, The University of Texas Health Science Center at Houston, Houston, TX 77030, USA.
47. Human Genome Sequencing Center, Baylor College of Medicine, Houston, TX 77030, USA.
48. Division of Epidemiology & Community Health, School of Public Health, University of Minnesota, Minneapolis, MN, USA.
49. Kaiser Permanente Northern California, Oakland, CA, USA.
50. Division of Preventive Medicine, School of Medicine, University of Alabama at Birmingham, Birmingham, AL 35294, USA.

51. Department of Biostatistics, University of Washington, Seattle, WA 98195, USA.
52. The Institute for Translational Genomics and Population Sciences, Department of Pediatrics, The Lundquist Institute for Biomedical Innovation at Harbor-UCLA Medical Center, Torrance, CA 90502, USA.
53. Computational Medicine Core, Center for Lung Biology, UW Medicine Sleep Center, Department of Medicine, University of Washington, Seattle, WA 98109, USA.
54. Cardiovascular Health Research Unit, Department of Medicine, University of Washington, Seattle, WA 98101, USA.
55. Department of Radiology and Nuclear Medicine, Erasmus University Medical Center, Rotterdam, The Netherlands.
56. Population Sciences Branch, National Heart, Lung, and Blood Institute Framingham Heart Study, Framingham, MA 01702, USA.
57. JHS Graduate Training and Education Center, Jackson State University, Jackson, MS 39213, USA.
58. Center for Public Health Genomics, University of Virginia, Charlottesville, VA 22908, USA.
59. Division of General Medicine, Department of Medicine, Columbia University, New York, NY 10032, USA.
60. Division of Endocrinology, Department of Internal Medicine, Leiden University Medical Center, Leiden 2333ZA, The Netherlands.
61. Department of Clinical Epidemiology, Leiden University Medical Center, Leiden 2333ZA, Netherlands.
62. Department of Public Health and Primary Care, Leiden University Medical Center, Leiden 2333ZA, The Netherlands.
63. George Washington University School of Medicine and Health Sciences, Washington DC, USA.
64. MedStar Heart and Vascular Institute, Washington DC, USA.
65. Department of Epidemiology, University of Iowa College of Public Health, Iowa City, IA, USA.
66. Institute of Biomedicine, School of Medicine, University of Eastern Finland, Kuopio Campus, Finland
67. Institute of Clinical Medicine, Internal Medicine, University of Eastern Finland, Kuopio 70211, Finland.
68. Alzheimer Scotland Dementia Research Centre, The University of Edinburgh, Edinburgh EH8 9JZ, UK.
69. Department of Psychiatry, Amsterdam Neuroscience and Amsterdam Public Health Research Institute, Amsterdam UMC, Vrije Universiteit, Amsterdam 1081 BT, The Netherlands.
70. Field and Environmental Data Science, Benson Hill Inc., St. Louis, MO 63132, USA.
71. Molecular Genetics and Genomics Program, Wake Forest School of Medicine, Winston-Salem, NC 27157, USA.
72. German Centre for Cardiovascular Research (DZHK), partner site Munich Heart Alliance, Neuherberg, Germany.
73. Institute of Medical Biostatistics, Epidemiology and Informatics (IMBEI), University Medical Center, Johannes Gutenberg University, Mainz 55101, Germany.
74. Institute of Genetic Epidemiology, Helmholtz Zentrum München, German Research Center for Environmental Health, Neuherberg 85764, Germany.
75. Institute of Human Genetics, Helmholtz Zentrum München, German Research Center for Environmental Health, Neuherberg 85764, Germany.

76. Institute of Medical Psychology, Ludwig-Maximilians-Universität München, Munich 80336, Germany.
  77. Department of Internal Medicine B, University Medicine Greifswald, Greifswald 17489, Germany.
  78. Sleep Health Service, Respiratory and Sleep Services, Southern Adelaide Local Health Network, Adelaide, South Australia 5042, Australia.
  79. Adelaide Institute for Sleep Health, Flinders University, Adelaide, South Australia 5042, Australia.
  80. Department of Pulmonary Physiology and Sleep Medicine, Sir Charles Gairdner Hospital, Perth, Western Australia 6009, Australia.
  81. Department of Clinical Physiology, Tampere University Hospital, Tampere 33521, Finland.
  82. Public Health Sciences, Wake Forest School of Medicine, Winston-Salem, NC 27157, USA.
  83. German Center for Diabetes Research (DZD e.V.), Neuherberg 85764, Germany.
  84. Department Psychiatry and Psychotherapy, University Medicine Greifswald, Greifswald 17489, Germany.
  85. Faculty of Medicine, University of Iceland, Reykjavik 101, Iceland
  86. Department of Genetics, Harvard Medical School, Boston, MA 02115, USA.
  87. Cardiovascular Health Research Unit, Departments of Epidemiology, Medicine and Health Services, University of Washington, Seattle, WA 98101, USA.
  88. Kaiser Permanente Washington Health Research Institute, Seattle, WA 98101, USA.
  89. Nuffield Department of Population Health, University of Oxford, Oxford, UK.
  90. Division of Public Health Sciences, Fred Hutchinson Cancer Research Center, Seattle, Washington, USA.
  91. Department of Population and Quantitative Health Sciences, Case Western Reserve University, Cleveland, OH 44106, USA.
  92. Department of Clinical Physiology and Nuclear Medicine, Kuopio University Hospital, Kuopio 70029, Finland
  93. Biostatistics, Preventive Medicine, University of Southern California, Los Angeles, California, USA.
  94. Division of Pulmonary Medicine, Department of Medicine, Beth Israel Deaconess Medical Center, Boston, MA 02115, USA.
- \*These authors contributed equally  
#These authors jointly directed this work

#### Corresponding authors

Heming Wang

Division of Sleep and Circadian Disorders, Brigham and Women's Hospital, Harvard Medical School, 221 Longwood Ave BLI 252, Boston, MA 02115

Email: [hwang@bwh.harvard.edu](mailto:hwang@bwh.harvard.edu)

Tel: +1 617 732 4440

Diana van Heemst

Department of Internal Medicine, Section of Gerontology and Geriatrics, Leiden University Medical Center, Albinusdreef 2, 2333ZA, Leiden, the Netherlands.

Email: [d.van\\_heimst@lumc.nl](mailto:d.van_heimst@lumc.nl)

Tel: +31 71 526 6640

## Abstract

Long and short sleep duration are associated with elevated blood pressure (BP), possibly through effects on molecular pathways that influence neuroendocrine and vascular systems. To gain new insights into the genetic basis of sleep-related BP variation, we performed genome-wide gene by short or long sleep duration interaction analyses on four BP traits (systolic BP, diastolic BP, mean arterial pressure, and pulse pressure) across five ancestry groups using 1 degree of freedom (1df) interaction and 2df joint tests. Primary multi-ancestry analyses in 62,969 individuals in stage 1 identified 3 novel loci that were replicated in an additional 59,296 individuals in stage 2, including rs7955964 (*FIGNL2/ANKRD33*) showing significant 1df interactions with long sleep duration and rs73493041 (*SNORA26/C9orf170*) and rs10406644 (*KCTD15/LSM14A*) showing significant 1df interactions with short sleep duration ( $P_{\text{int}} < 5 \times 10^{-8}$ ). Secondary ancestry-specific two-stage analyses and combined stage 1 and 2 analyses additionally identified 23 novel loci that need external replication, including 3 and 5 loci showing significant 1df interactions with long and short sleep duration, respectively ( $P_{\text{int}} < 5 \times 10^{-8}$ ). Multiple genes mapped to our 26 novel loci have known functions in sleep-wake regulation, nervous and cardiometabolic systems. We also identified new gene by long sleep interactions near five known BP loci ( $\leq 1\text{Mb}$ ) including *NME7*, *FAM208A*, *MKLN1*, *CEP164*, and *RGL3/ELAVL3* ( $P_{\text{int}} < 5 \times 10^{-8}$ ). This study indicates that sleep and primary mechanisms regulating BP may interact to elevate BP level, suggesting novel insights into sleep-related BP regulation.

**Keywords:** Gene-environment interaction, sleep, blood pressure, multi-ancestry

## Introduction

Hypertension (HTN), including elevations in systolic blood pressure (SBP) and/or diastolic blood pressure (DBP), is a major risk factor for cardiovascular diseases, stroke, renal failure and heart failure<sup>1,2</sup>. The heritability of HTN is estimated to be 30-60% in family studies<sup>3,4</sup>. Recent well-powered large genome-wide association studies (GWAS) of blood pressure (BP) have identified over 1,000 loci; however, in total these explain less than 3.5% of BP variation<sup>5-17</sup>. Gene-environment (G×E) interaction analyses have been proposed to explain additional heritability and identified novel loci for traits associated with cardiometabolic diseases<sup>18-21</sup>.

Long and short sleep durations are associated with elevated BP, possibly through effects on molecular pathways that influence neuroendocrine and vascular systems<sup>22,23</sup>. Recent multi-ancestry interaction analyses between genetic variants and sleep duration (gene-sleep for short) on blood lipid traits have identified novel loci and potentially distinct mechanisms for short- and long-sleep associated dyslipidemia, and suggest a modification effect of sleep-wake exposures on lipid biology<sup>21</sup>. We hypothesize that differences in sleep duration may also modify the effect of genetic factors on BP. Assessment of genetic association studies accounting for potential gene-sleep interactions may help identify novel BP loci and reveal new biological mechanisms that can be explored for treatment or prevention of HTN.

Within the Cohorts for Heart and Aging Research in Genomic Epidemiology (CHARGE) Gene-Lifestyle Interactions Working Group<sup>24</sup>, we investigate gene-sleep interactions on BP traits in 122,265 individuals from five ancestry groups. We utilize both the 1 degree of freedom (df) test of interaction effect and the 2df joint test of main and interaction effects<sup>25</sup>, and identify novel loci for BP.

## Results

### *Genome-wide gene-sleep interaction analyses*

We performed genome-wide meta-analysis of gene-sleep interactions on four BP traits (SBP, DBP, mean arterial pressure [MAP], and pulse pressure [PP]) in 30 cohorts in two stages (Supplementary Notes). Stage 1 discovery analyses included 62,969 individuals of European (EUR), African (AFR), Asian (ASN), Hispanic (HIS), and Brazilian (BRZ) ancestries from 16 studies (Supplementary Tables 1-3). Stage 2 replication analyses included 59,296 individuals of EUR, AFR, ASN and HIS ancestries from 14 additional studies (Supplementary Tables 4-6). We examined long total sleep time (LTST) and short total sleep time (STST) separately as lifestyle exposures. Given the heterogeneity of age, sleep duration and BP levels across cohorts and ancestry groups, as well as differences in how sleep duration was assessed (Supplementary Tables 2 and 5), we followed procedures used in prior research<sup>21</sup> to categorize 20% of each sample as long sleepers and 20% as short sleepers based on responses to questionnaires, accounting for age and sex variability within each cohort (Methods).

The overall study design of primary multi-ancestry analyses and secondary analyses restricted to EUR and AFR groups is described in Fig. 1. The analyses were performed without and with adjustment for body mass index (BMI) to identify genetic loci through or independent to obesity pathways (Methods)<sup>26,27</sup>. The Miami and QQ plots of stage 1 discovery analyses are provided in Supplementary Figs 1-6. Variants with  $P_{\text{int}}$  or  $P_{\text{joint}} < 10^{-6}$  in stage 1 ( $n_{\text{variant}}=1976$ ) were followed up in stage 2 replication analyses and subsequently meta-analyzed with stage 1 summary statistics. Of these, 1081 variants were available in stage 2 cohorts and passed quality control, of which 268 variants showed  $P_{\text{joint}}$  or  $P_{\text{int}} < 0.05$ . The replication significance threshold



was defined as stage 2  $P < 0.05$  and stage 1 + 2  $P < 5 \times 10^{-8}$ , with consistent directions of association effects.

Our primary two-stage multi-ancestry analyses replicated 3 novel loci ( $r^2 < 0.1$  and  $> 1\text{Mb}$  from any previously identified BP locus) using the 1df interaction test. Among these loci, rs7955964 (*FIGNL2/ANKRD33*) showed significant 1df interactions with LTST, while rs73493041 (*SNORA26/C9orf170*) and rs10406644 (*KCTD15/LSM14A*) revealed significant 1df interactions with STST ( $P_{\text{int}} < 5 \times 10^{-8}$ ; Table 1). The regional association plots are shown in Supplementary Fig. 7. Consistent directions of main and interaction effects were observed across different cohorts (Fig. 2). Note that since rs7955964 and rs10406644 are common only in AFR and HIS cohorts (minor allele frequency  $> 1\%$ ), the association effects may be driven by African ancestral alleles. With and without adjustment for BMI showed similar association results at those three loci (Table 1). Using 2df joint test we identified 9 loci that were within 1Mb from previously reported BP loci ( $P_{\text{joint}} < 5 \times 10^{-8}$ ; Supplementary Table 7). However, none of these loci showed nominal significant 1df interaction association with LTST or STST ( $P_{\text{int}} > 0.05$ ).

In secondary meta-analyses restricted to EUR or AFR individuals, the 1df interaction test did not identify any significant locus. The 2df joint test in EUR group identified 1 locus near previously reported BP loci ( $\leq 1\text{Mb}$ ; Supplementary Table 7). The 2df joint test in AFR group identified 3 novel loci after incorporating interactions with LTST (stage 1  $P_{\text{joint}} < 5 \times 10^{-8}$  and stage 2  $P_{\text{joint}} < 0.05$ , with consistent directions of main effects), including rs111887471 (*TRPC3/KIAA1109*), rs114043188 (*ANK*), and rs138967672 (*RP11-322L20.1/RP11-736P16.1*) (Supplementary Table 8 and Supplementary Fig. 8). However, these 3 variants did not survive our formal replication criteria of stage 1+2  $P < 5 \times 10^{-8}$ , possibly reflecting heterogeneity between discovery and replication cohorts.

We further performed multi-ancestry genome-wide meta-analyses combining stage 1 and stage 2 cohorts to maximize statistical power (Methods; Miami and QQ plots in Supplementary Figs 9-12). These analyses additionally identified 20 loci near previously reported BP loci ( $\leq 1\text{Mb}$ ) and 56 unreported loci ( $> 1\text{Mb}$  from previously reported BP) with  $P_{\text{joint}}$  or  $P_{\text{int}} < 5 \times 10^{-8}$  (Supplementary Tables 9-11). Loci near known BP genes, including *NME7*, *FAM208A*, *MKLNI*, *CEP164*, and *RGL3/ELAVL3*<sup>8-12</sup> showed significant 1df interactions with LTST ( $P_{\text{int}} < 5 \times 10^{-8}$ ; Supplementary Table 9). Replication in independent datasets is needed to validate those unreported loci. We only report 20 novel loci that passed a stricter significance threshold ( $P_{\text{joint}}$  or  $P_{\text{int}} < 3.125 \times 10^{-9}$ ), accounting for 2 independent BP traits, 2 exposures, 2 tests (joint and interaction), with and without BMI adjustment (Supplementary Table 10 and Supplementary Fig 13). Among these 20 novel loci, 3 loci showed genome-wide significant 1df interaction with LTST and 5 loci showed genome-wide significant 1df interactions with STST ( $P_{\text{int}} < 5 \times 10^{-8}$ ; Supplementary Table 10). We also looked up the previously validated 362 BP loci<sup>5-16</sup> and 113 sleep duration loci<sup>28</sup> in the combined analyses, but none of these showed significant 1df interactions after accounting for multiple comparisons ( $P_{\text{int}} > 10^{-4}$ ; Supplementary Tables 12-15).

We estimated the variance of BP traits explained by 3 replicated and 23 additional novel loci (3 in AFR two-stage analyses and 20 in combined analyses) using the R package VarExp<sup>29</sup> (Supplementary Table 16). The 3 replicated novel variants together explained 0.002-0.039% and 0.304-0.939% of BP variation in EUR and AFR, respectively. The other 23 variants additionally explained 0.230-0.419% and 0.806-2.597% of BP variation in EUR and AFR. Given the limited sample sizes in the AFR group, the estimation of BP variation in AFR is likely inflated.

*Associations with other relevant traits*

We looked up the associations between the 3 replicated and 23 additional novel loci with cardiovascular diseases, stroke, chronic kidney disease, and self-reported and objective (derived from 7-day accelerometry) sleep traits using publicly available genome-wide summary statistics from large GWAS<sup>28,30-39</sup> (Supplementary Tables 17-22). One of the replicated loci rs73493041 (*SNORA26/C9orf170*) was associated with self-reported chronotype (morningness vs eveningness) ( $P=9.1\times 10^{-6}$ ; Supplementary Table 21). Among the other novel loci, rs17036094 (*PSRC1/MYBPHL*) was associated with coronary artery disease and myocardial infarction ( $P\leq 0.005$ ; Supplementary Table 18), and rs140526840 (*FSTL5*) was associated with chronic kidney disease ( $P=0.006$ ; Supplementary Table 20),

### *Bioinformatics analyses*

All of the 26 novel variants were mapped to intergenic or intronic regions using HaploReg<sup>40</sup>, including 4 in promoter histone marks, 11 in enhancer histone marks, 10 in DNase, 3 altered the binding sites of regulatory proteins and 2 conserved elements (Supplementary Table 23).

Among the 3 replicated novel loci, rs73493041 (*SNORA26/C9orf170*) was an eQTL for *GAS1* in suprapubic skin using GTEx (v8)<sup>41</sup> (Supplementary Table 24). Using PLINK pruning and SNPsea<sup>42</sup>, rs7955964 (*SNORA26/C9orf170*) was mapped to a region of 10 genes (Supplementary Table 25), including *ANKRD33* and *NR4A1*, implicated in sleep-wake control regulation and the neurovascular system<sup>43,44</sup>. Rs10406644 (*KCTD15/LSM14A*) was mapped to a region overlapping with 9 genes (Supplementary Table 26), including *KCTD15* and *CHST8*,

previously associated with adiposity traits and involved in neurodevelopmental and neuropsychiatric diseases<sup>45-47</sup> (see Discussion).

Among the other 23 novel loci, 4 variants showed strong eQTL evidence across various tissues such as blood and adipose tissue (Supplementary Table 24). 14 loci were mapped to genes with known functions in cardiac and nervous systems (e.g., *TRPC3*<sup>48</sup>, *RYR2*<sup>49</sup>, *ANK2*<sup>50</sup>, *GJA4*<sup>51</sup> and *SORT1*<sup>52</sup>) and associated with other cardiometabolic (e.g., *HTR1A*<sup>53</sup>, *PSRC1*<sup>54</sup>, *PSKHI*<sup>55</sup>), inflammatory (e.g. *IL33*<sup>56</sup>), cognition (e.g., *FRMD4A*<sup>57</sup>) and psychiatric traits (e.g. *NFATC3*<sup>58</sup>) (Supplementary Tables 25 and 26).

In total, 11 novel loci harbored genes implicated in Mendelian syndromes such as ventricular tachycardia and cryptogenic cirrhosis. 13 loci harbored one or more genes with potential drug targets (Supplementary Tables 25 and 26).

We performed tissue and pathway enrichment analyses using annotated genes under novel association regions using FUMA<sup>59</sup> (Supplementary Tables 27 and 28). Genes under the association regions in gene-LTST interaction analyses were enriched in multiple artery and cardiac muscle related pathways (Supplementary Table 29).

## Discussion

We performed gene-sleep interaction analyses on BP using 122,265 individuals from 5 ancestry groups in 30 studies, using both a 1df test of interaction effect and a 2df joint test of main and interaction effects. Following a two-stage design, we identified 3 novel loci that were replicated in additional samples, including rs7955964 (*FIGNL2/ANKRD33*) showing significant interactions with LTST, and rs73493041 (*SNORA26/C9orf170*) and rs10406644

(*KCTD15/LSM14A*) showing significant interactions with STST ( $P_{\text{int}} < 5 \times 10^{-8}$ ). Secondary analyses additionally identified 3 novel loci with weak replication evidence in AFR groups using 2df joint test. Combined stage 1 and 2 analyses identified another 20 novel loci after accounting for multiple comparisons ( $P_{\text{joint}}$  or  $P_{\text{int}} < 3.125 \times 10^{-9}$ ), which require external replication. The associations were largely unchanged after additionally adjusting for BMI. Collectively, these 26 loci explained 0.23-0.43% of BP variation in EUR and 1.33-2.96% BP variation in AFR groups.

The emergence of novel loci after considering gene-sleep interactions suggests an important modifying role of sleep on BP regulation, which involves both central and peripheral regulation (including the brain, adrenal glands, kidneys, and vasculature). Insufficient or short sleep can increase BP through effects on elevating sympathetic nervous system activity and altering hypothalamic-pituitary-adrenal (HPA) axis activities, leading to hormonal changes, endothelial dysfunction, insulin resistance, and systemic inflammation<sup>22,60</sup>. The mechanisms underlying the association between long sleep duration and BP are less well understood, and may reflect circadian misalignment in a 24-hour period, including disrupted sleep-wake cycle, a misalignment of internal biological clocks with the external environment, and desynchronized central and peripheral clocks in tissues relevant for BP control<sup>61</sup>. The importance of circadian control of BP is evident by the normal nocturnal decline (“dipping”) in BP. Non-dipping of BP, associated with increased mortality, is observed with both sleep disturbances and abnormalities of sodium transport in the kidney<sup>62,63</sup>. Our data suggest that sleep and renal and neuro-endocrine control of BP may interact to influence susceptibility to HTN. The novel loci found by gene-LTST and gene-STST interaction analyses were distinct, supporting the different mechanisms of short and long sleep modifying BP. Similarly, in prior gene-sleep interaction analyses for blood lipids, LTST and STST each also modified gene effects in a non-overlapping pattern<sup>21</sup>.

Primary two-stage multi-ancestry analyses identified 3 novel loci. At rs7955964 (*FIGNL2/ANKRD33*), *ANKRD33* is expressed in retinal photoreceptors and the pineal gland and acts as a transcriptional repressor for *CRX*-activated photoreceptor gene regulation<sup>43</sup>. Given the importance of light in the central regulation of circadian rhythms, long sleep- a circadian disruptor- may interact with this gene to influence BP<sup>62</sup>. Additionally, *NR4A1* (also at rs7955964) is a member of the nuclear hormone receptors, which regulate neurohormonal systems including dopamine and norepinephrine and cardiac stress responses<sup>44</sup>. At rs10406644 (*KCTD15/LSM14A*), *CHST8* and *KCTD15* are associated with adiposity traits<sup>45,46</sup> and *GPI* functions in glucose metabolism and immune system pathways<sup>64,65</sup>. Short sleep may exacerbate weight gain and metabolic dysfunction<sup>66</sup>, thus amplifying effects of this locus on BP. *KCTD15* belongs to a gene family involved in neurodevelopmental and neuropsychiatric diseases<sup>47</sup>. Rs73493041 (*SNORA26/C9orf170*) was an eQTL for *GAS1*, a pleiotropic regulator of cellular homeostasis and widely expressed in the central nervous system<sup>67,68</sup>. This variant was also significantly associated with self-reported chronotype, an indicator of circadian preference ( $P=9.1 \times 10^{-6}$ ; Supplementary Table 20).

Given the high prevalence of HTN in African Americans, there is a critical need to identify modifiable risk factors. Notably, African Americans have poorly controlled HTN as well as circadian abnormalities in BP regulation<sup>69</sup>. They also have a higher prevalence of short and long sleep duration compared to individuals of European ancestry<sup>70,71</sup>, likely due to combinations of social-environmental exposures and genetic and epigenetic susceptibility<sup>72</sup>. In AFR specific gene-LTST analyses we identified 3 unreported loci, including two loci mapped to *TRPC3* and *ANK2* with known functions in cardiac ion ( $\text{Na}^+$  and  $\text{Ca}^{2+}$ ) homeostasis<sup>48,50</sup>. These associations in AFR may reflect differences in BP control with individuals of African ancestry

having greater sodium sensitivity<sup>73</sup>, with BP effects amplified by disrupted circadian rhythm regulation due to long sleep<sup>63</sup>. While intriguing, these associations were observed in African Americans ( $P_{\text{joint}} < 5 \times 10^{-8}$ ) and the only available replication sample was individuals of African ancestry from the UK ( $P_{\text{joint}} < 0.05$ ). There may be a systematic difference of the admixture structure between the discovery and replication cohorts. Future analyses using larger AFR samples will be needed to validate these findings and further identify the potential for sleep disturbances to interact with BP regulatory systems in AFR who are at increased risk for HTN-associated morbidities.

Although we did not observe significant 1df interactions with sleep duration on the 362 previously reported BP or 101 sleep duration variants (Supplementary Tables 12-15), we identified 30 loci within 1Mb from previously reported BP regions (Supplementary Tables 7 and 9). Among those, variants in/near *NME7*, *FAM208A*, *MKLN1*, *CEP164*, and *RGL3/ELAVL3* showed significant 1df interactions with LTST ( $P_{\text{int}} < 5 \times 10^{-8}$ ; Supplementary Table 9). Some of these genes have known functions in neuronal systems, including *MKLN1* regulating the internalization and transport of the GABA<sub>A</sub> receptor<sup>74,75</sup> and *ELAVL3* encoding a neural-specific RNA-binding protein involved in neuronal differentiation and maintenance<sup>76</sup>.

In this study we defined short and long sleep duration using self-reported questionnaires, which can result in misclassification<sup>77,78</sup>, potentially reducing statistical power. Although we used a within cohort approach for harmonizing sleep duration that accounted for age and sex differences across cohorts, there may be systematic residual differences in sleep assessments that resulted in heterogeneity across our samples. Future work using objective measurements (e.g., polysomnography and actigraphy data) may provide further insight into sleep-related BP mechanisms.

Some of our most interesting findings - and ones with high potential public health impact due to the burden of extreme sleep duration and HTN in AFR group. Unfortunately, limited samples of AFR were available for replication. We identified 1,976 variants with significant association effect in gene-sleep interaction analyses in stage 1. However, only 1,081 of those variants were available in stage 2 analyses. Most of the unavailable variants in stage 2 had been identified in non-EUR cohorts and were rare in EUR populations (MAF<1%). Future studies following-up these “missing” variants in diverse groups and additional studies of minority populations are needed to further understand mechanisms for BP regulation that are modulated by sleep. In addition, some of our findings were mapped to large genomic regions covering many genes. Further fine-mapping analyses using sequencing data or biochemistry experiments may further clarify the causal variants.

In summary, we performed a large-scale gene-sleep interaction meta-analyses in multi-ancestry groups. In addition to identifying interactions at a genome-wide significant level near 5 previously reported BP regions, we identified 3 novel loci with formal replication and 23 novel loci that need external replication. Multiple genes showing significant interactions with long or short sleep duration were functional in tissues relevant for BP control, and associated with circadian, metabolic, and neuropsychiatric traits. Prior research indicates that extreme sleep durations (short or long) are strongly associated with cardiovascular disease and mortality through causal and noncausal pathways<sup>22,23,79</sup>. Our data suggest that interactions between sleep and BP-regulating genes may contribute to the increased cardiovascular morbidity observed with extreme sleep duration.

## Methods



## *Samples*

This study included 30 cohorts comprising of five ancestry groups including European (EUR), African (AFR), Asian (ASN), Hispanic (HIS), and Brazilian (BRZ) groups. Ancestries were harmonized by each cohort based on self-reported data and removed genetic principal components (PCs) outliers. Gene-sleep interaction analyses were restricted to men and women between 18-80 years old and with available sleep, blood pressure (BP), and genotype data imputed to 1000 genome reference panel. Analyses of each ancestry group were performed locally by individual cohorts following a universal analytic protocol. Descriptions of each cohort are available in Supplementary Notes. Sample characteristics are present in Supplementary Table 1-6.

This work was approved by the Institutional Review Board of Washington University in St. Louis and complies with all relevant ethical regulations. For each of the participating cohorts, the appropriate ethics review board approved the data collection and all participants provided informed consent.

## *Phenotypes, lifestyle exposures, and covariates*

In this study, we focused on two lifestyle variables (short total sleep time [STST] and long total sleep time [LTST]) and investigated their interaction with genetic components on four BP traits (systolic BP [SBP], diastolic BP [DBP], mean artery pressure [MAP], and pulse pressure [PP]).

Resting/sitting SBP and DBP were recorded in mmHg and averaged among multiple readings at the same visit. Effects of anti-hypertensive (BP lowering) medications were

addressed by adding 15 mmHg and 10mmHg to SBP and DBP, respectively. We then derived MAP and PP from the medication adjusted SBP and DBP as  $MAP=DBP + (SBP-DBP)/3$  and  $PP=SBP-DBP$ . For each of the four BP variables, we winsorized the very extreme BP values to 6 standard deviations (SD)<sup>24</sup>.

Total sleep time (TST) was harmonized from questions similar to “On an average day, how long do you sleep?”. Questions were either asked as “open (free text)” or “multiple choice”. Individuals reported shorter than 3 or longer than 14 hours of TST were further excluded in this study. For most of the cohorts, we performed linear regression on TST adjusting for age and sex in each ancestry group of each cohort and obtained age- and sex-adjusted residuals. Short total sleep time (STST) and long total sleep time (LTST) were then defined as the lowest 20<sup>th</sup> and highest 80<sup>th</sup> percentiles of the residual in each ancestry of each cohort. In some cases, cohort-specific definitions (e.g. “multiple choice”) were used to defined STST and LTST.

We adjusted for age, sex, and when appropriate for field center, family and population structures, and other study specific covariates (e.g., sampling weights and census block in HCHS/SOL<sup>80</sup>). Body mass index (BMI; calculated as  $weight / height^2$  [kilograms/meters<sup>2</sup>]) has been suggested to influence BP and sleep duration<sup>26,27</sup>, and may play a potential role in gene-sleep interactions on BP. Therefore, we performed additional analyses adjusting for BMI.

### *Genotypes*

Each study performed genotyping and imputation locally using various platforms and software as described in Supplementary Tables 3 and 6. The cosmopolitan reference panels from the 1000 Genomes Project Phase I Integrated Release Version 3 Haplotypes (2010-11 data freeze,

2012-03-14 haplotypes) was specified for imputation. Variants with minor allele frequency <1% were excluded by each study.

Upon completion of the analyses by each local institution, all summary data were stored centrally for further processing and meta-analyses. We performed study level quality control (QC) on study specific results using the R package EasyQC<sup>81</sup> ([www.genepi-regensburg.de/easyqc](http://www.genepi-regensburg.de/easyqc)). We performed harmonization of alleles, comparison of allele frequencies with ancestry-appropriate 1000 Genomes reference data, and harmonization of all single nucleotide polymorphism (SNP) IDs to a standardized nomenclature according to chromosome and position. We further excluded SNPs with the product of minor allele count (MAC) in the exposed group (LTST/STST=1) and imputation quality (MAC<sub>1</sub>×imputation quality) less than 20.

### *Discovery analysis in stage 1*

The discovery analysis includes 40,385 EUR, 15,020 AFR, 2,465 ASN, 4,436 HIS, and 663 BRZ from 16 cohorts (Supplementary Tables 1-3). Each cohort performed genome-wide interaction analyses using the joint effect model

$$Y = \beta_0 + \beta_E E + \beta_G \text{SNP} + \beta_{GE} E \times \text{SNP} + \beta_C C, (1)$$

Where Y is one of the four BP phenotypes, E is STST or LTST, G is the dosage of the imputed genetic variant coded additively, and C is the vector of covariates (with or without adjustment of BMI). Therefore, in total 16 analyses in each ancestry group of each cohort were performed. The number of principal components included in the model was chosen according to cohort-specific preferences (ranging from 0 to 10). Various software such as ProbABEL<sup>82</sup>, MMAP and R package sandwich<sup>83</sup> were used to estimate the association effects for each study (Supplementary

Table 3). Summary statistics of the estimated genetic main effect ( $\beta_G$ ), interaction effect ( $\beta_{GE}$ ), and a robust estimation of the covariance between  $\beta_G$  and  $\beta_{GE}$  were provided by each cohort. We plotted the summary statistics of all effect estimates, standard errors (SE) and p-values across studies to visually compare discrepancies. We also generated SE vs sample and QQ plots to identify analytical problems.

We performed inverse-variance weighted meta-analysis for the 1 degree of freedom (df) interaction term, and 2 df joint fixed-effects meta-analysis of the combined main and interaction effects using Manning et al's method implemented in the METAL software<sup>25</sup>. Genomic control correlation was performed before and after meta-analyses. Variants present in less than 3 cohorts or 5000 individuals were further excluded. Ancestry-specific meta-analyses were performed with the same QC criteria in EUR and AFR but not in other groups. We reported results from both 1df interaction ( $P_{int}$ ) and 2df joint effect tests ( $P_{joint}$ ). Variants with  $P_{int}$  or  $P_{joint} < 10^{-6}$  were followed up in phase 2 replication analysis.

### *Replication analysis in stage 2 cohort*

Stage 2 includes 36,695 EUR, 6,981 AFR, 3,287 ASN, and 12,333 HIS individuals from 14 independent studies (Supplementary Tables 4-6). Seven cohorts performed genome-wide interaction analyses and other cohorts performed focused variant lookup upon the convenience of each analysis team (Supplementary Table 6). Most of the cohorts performed the same joint analysis model (1) as described in the stage 1 analyses, while stratified association analyses of main effect (2) among exposed group ( $E=1$ ) and unexposed group ( $E=0$ ) were performed in the UKB AFR individuals.

$$Y = \gamma_0 + \gamma_G \text{ SNP} + \gamma_C \text{ C}, (2)$$

We then estimated the main and interaction effects for the joint regression model as  $\beta_G = \gamma_{G|E=0}$  and  $\beta_{GE} = \gamma_{G|E=1} - \gamma_{G|E=0}$  using EasyStrata<sup>84</sup>. Study level QC was performed similarly as described for stage 1 cohorts. Meta-level QC and genomic control were not performed in stage 2 meta-analyses. Stage 1 and stage 2 summary statistics were also meta-analyzed. The replication threshold was then defined as stage 2  $P < 0.05$  and combined stage 1 + 2  $P < 5 \times 10^{-8}$ , with similar directions of association effects.

To maximize the statistical power, we also performed genome-wide combined stage 1 and 2 meta-analyses using all stage 1 cohorts and seven stage 2 cohorts (Supplementary Table 6) with genome-wide results in multi-ancestry and EUR groups. Genomic control correlation was performed before and after meta-analyses. Additional novel loci were reported at a stricter significant threshold ( $P < 3.125 \times 10^{-9}$ ), accounting for 2 independent BP traits, 2 exposures, 2 tests (joint and interaction), with and without BMI adjustment.

### *Bioinformatics analyses*

We pruned independently associated loci using the PLINK prune function with  $r^2 \geq 0.1$  from the lead variant. Loci with physical distance  $> 1\text{MB}$  from any known BP loci were considered as novel. We annotated functional effects for novel loci using HaploReg<sup>40</sup>, Regulome<sup>85</sup>, and GTex (v8)<sup>41</sup> database. In addition to genes mapped by PLINK pruning, we also annotated the genes under the association regions using SNPsea<sup>42</sup> with  $r^2 \geq 0.5$  from the lead variant using 1000 genome European reference panel. Genes under the association regions were further interrogated for associated phenotypes, Mendelian diseases, and druggable targets using

PheGeni <sup>86</sup>, OMIM <sup>87</sup>, and DGIdb <sup>88</sup>. Tissue and pathway enrichment analyses were performed using online software FUMA <sup>59</sup> MAGMA <sup>89</sup> and MsigDB <sup>90</sup>.

## **Acknowledgments**

This project was supported by the US National Heart, Lung, and Blood Institute (NHLBI) R01HL118305. H.W. and S.R. was supported by NHLBI R35HL135818. B.E.C. was supported by NHLBI K01HL135405. A.R.B. was supported by the Intramural Research Program of the National Institutes of Health in the Center for Research on Genomics and Global Health (CRGGH). The CRGGH is supported by the National Human Genome Research Institute, the National Institute of Diabetes and Digestive and Kidney Diseases, the Center for Information Technology, and the Office of the Director at the National Institutes of Health (1ZIAHG200362). D.v.H. was supported by the European Commission funded project HUMAN (Health-2013-INNOVATION-1-602757). The CHARGE cohorts was supported in part by NHLBI infrastructure grant HL105756. Study-specific acknowledgments can be found in the Supplementary Notes.

## **Author contributions:**

H.W., B.E.C., and J.L. conducted the centralized data analyses, including quality controls, meta-analyses, and post association lookups and bioinformatics. H.W., R.N., B.E.C., K.S., T.W.W., J.L., Y.J.S., A.R.B., D.C.R., S.R. and D.v.H. were part of the writing group and participated in study design, interpreting the data, and drafting the manuscript. All other co-authors were responsible for cohort-level data collection, cohort-level data analysis and critical reviews of the draft paper. All authors approved the final version of the paper that was submitted to the journal.

### **Competing Interests:**

D.O.M.K. is a part time research consultant at Metabolon, Inc. B.M.P. serves on the DSMB of a clinical trial funded by the manufacturer (Zoll LifeCor) and on the Steering Committee of the Yale Open Data Access Project funded by Johnson & Johnson. H.J.G. has received research support from the German Research Foundation (DFG), the German Ministry of Education and Research (BMBF), the DAMP Foundation, Fresenius Medical Care, the EU “Joint Programme Neurodegenerative Disorders (JPND) and the European Social Fund (ESF)”. The remaining authors declare no competing interests.



## References

1. Berry, J.D. *et al.* Lifetime risks of cardiovascular disease. *N Engl J Med* **366**, 321-9 (2012).
2. Lim, S.S. *et al.* A comparative risk assessment of burden of disease and injury attributable to 67 risk factors and risk factor clusters in 21 regions, 1990-2010: a systematic analysis for the Global Burden of Disease Study 2010. *Lancet* **380**, 2224-60 (2012).
3. Cooper, R.S. *et al.* Genome scan among Nigerians linking blood pressure to chromosomes 2, 3, and 19. *Hypertension* **40**, 629-33 (2002).
4. Levy, D. *et al.* Evidence for a gene influencing blood pressure on chromosome 17. Genome scan linkage results for longitudinal blood pressure phenotypes in subjects from the framingham heart study. *Hypertension* **36**, 477-83 (2000).
5. Newton-Cheh, C. *et al.* Genome-wide association study identifies eight loci associated with blood pressure. *Nat Genet* **41**, 666-76 (2009).
6. Levy, D. *et al.* Genome-wide association study of blood pressure and hypertension. *Nat Genet* **41**, 677-87 (2009).
7. International Consortium for Blood Pressure Genome-Wide Association, S. *et al.* Genetic variants in novel pathways influence blood pressure and cardiovascular disease risk. *Nature* **478**, 103-9 (2011).
8. Ehret, G.B. *et al.* The genetics of blood pressure regulation and its target organs from association studies in 342,415 individuals. *Nat Genet* **48**, 1171-1184 (2016).
9. Liu, C. *et al.* Meta-analysis identifies common and rare variants influencing blood pressure and overlapping with metabolic trait loci. *Nat Genet* **48**, 1162-70 (2016).
10. Surendran, P. *et al.* Trans-ancestry meta-analyses identify rare and common variants associated with blood pressure and hypertension. *Nat Genet* **48**, 1151-1161 (2016).
11. Hoffmann, T.J. *et al.* Genome-wide association analyses using electronic health records identify new loci influencing blood pressure variation. *Nat Genet* **49**, 54-64 (2017).
12. Warren, H.R. *et al.* Genome-wide association analysis identifies novel blood pressure loci and offers biological insights into cardiovascular risk. *Nat Genet* **49**, 403-415 (2017).
13. Evangelou, E. *et al.* Genetic analysis of over 1 million people identifies 535 new loci associated with blood pressure traits. *Nat Genet* **50**, 1412-1425 (2018).
14. Giri, A. *et al.* Trans-ethnic association study of blood pressure determinants in over 750,000 individuals. *Nat Genet* **51**, 51-62 (2019).
15. Franceschini, N. *et al.* Genome-wide association analysis of blood-pressure traits in African-ancestry individuals reveals common associated genes in African and non-African populations. *Am J Hum Genet* **93**, 545-54 (2013).
16. Zhu, X. *et al.* Meta-analysis of correlated traits via summary statistics from GWASs with an application in hypertension. *Am J Hum Genet* **96**, 21-36 (2015).
17. Liang, J. *et al.* Single-trait and multi-trait genome-wide association analyses identify novel loci for blood pressure in African-ancestry populations. *PLoS Genet* **13**, e1006728 (2017).
18. Manning, A.K. *et al.* A genome-wide approach accounting for body mass index identifies genetic variants influencing fasting glycemic traits and insulin resistance. *Nat Genet* **44**, 659-69 (2012).
19. Hunter, D.J. Gene-environment interactions in human diseases. *Nat Rev Genet* **6**, 287-98 (2005).
20. Sung, Y.J. *et al.* A Large-Scale Multi-ancestry Genome-wide Study Accounting for Smoking Behavior Identifies Multiple Significant Loci for Blood Pressure. *Am J Hum Genet* **102**, 375-400 (2018).
21. Noordam, R. *et al.* Multi-ancestry sleep-by-SNP interaction analysis in 126,926 individuals reveals lipid loci stratified by sleep duration. *Nat Commun* **10**, 5121 (2019).

22. Gangwisch, J.E. A review of evidence for the link between sleep duration and hypertension. *Am J Hypertens* **27**, 1235-42 (2014).
23. Daghlas, I. *et al.* Sleep Duration and Myocardial Infarction. *J Am Coll Cardiol* **74**, 1304-1314 (2019).
24. Rao, D.C. *et al.* Multiancestry Study of Gene-Lifestyle Interactions for Cardiovascular Traits in 610 475 Individuals From 124 Cohorts: Design and Rationale. *Circ Cardiovasc Genet* **10**(2017).
25. Manning, A.K. *et al.* Meta-analysis of gene-environment interaction: joint estimation of SNP and SNP x environment regression coefficients. *Genet Epidemiol* **35**, 11-8 (2011).
26. Grandner, M.A., Schopfer, E.A., Sands-Lincoln, M., Jackson, N. & Malhotra, A. Relationship between sleep duration and body mass index depends on age. *Obesity (Silver Spring)* **23**, 2491-8 (2015).
27. Martins, D., Tareen, N., Pan, D. & Norris, K. The relationship between body mass index, blood pressure and pulse rate among normotensive and hypertensive participants in the third National Health and Nutrition Examination Survey (NHANES). *Cell Mol Biol (Noisy-le-grand)* **49**, 1305-9 (2003).
28. Dashti, H.S. *et al.* Genome-wide association study identifies genetic loci for self-reported habitual sleep duration supported by accelerometer-derived estimates. *Nat Commun* **10**, 1100 (2019).
29. Laville, V. *et al.* VarExp: estimating variance explained by genome-wide GxE summary statistics. *Bioinformatics* **34**, 3412-3414 (2018).
30. Nelson, C.P. *et al.* Association analyses based on false discovery rate implicate new loci for coronary artery disease. *Nat Genet* **49**, 1385-1391 (2017).
31. Nikpay, M. *et al.* A comprehensive 1,000 Genomes-based genome-wide association meta-analysis of coronary artery disease. *Nat Genet* **47**, 1121-1130 (2015).
32. Malik, R. *et al.* Multiancestry genome-wide association study of 520,000 subjects identifies 32 loci associated with stroke and stroke subtypes. *Nat Genet* **50**, 524-537 (2018).
33. Tin, A. *et al.* Target genes, variants, tissues and transcriptional pathways influencing human serum urate levels. *Nat Genet* **51**, 1459-1474 (2019).
34. Teumer, A. *et al.* Genome-wide association meta-analyses and fine-mapping elucidate pathways influencing albuminuria. *Nat Commun* **10**, 4130 (2019).
35. Wuttke, M. *et al.* A catalog of genetic loci associated with kidney function from analyses of a million individuals. *Nat Genet* **51**, 957-972 (2019).
36. Jones, S.E. *et al.* Genome-wide association analyses of chronotype in 697,828 individuals provides insights into circadian rhythms. *Nat Commun* **10**, 343 (2019).
37. Lane, J.M. *et al.* Biological and clinical insights from genetics of insomnia symptoms. *Nat Genet* **51**, 387-393 (2019).
38. Wang, H. *et al.* Genome-wide association analysis of self-reported daytime sleepiness identifies 42 loci that suggest biological subtypes. *Nat Commun* **10**, 3503 (2019).
39. Jones, S.E. *et al.* Genetic studies of accelerometer-based sleep measures yield new insights into human sleep behaviour. *Nat Commun* **10**, 1585 (2019).
40. Ward, L.D. & Kellis, M. HaploReg: a resource for exploring chromatin states, conservation, and regulatory motif alterations within sets of genetically linked variants. *Nucleic Acids Res* **40**, D930-4 (2012).
41. Consortium, G.T. Human genomics. The Genotype-Tissue Expression (GTEx) pilot analysis: multitissue gene regulation in humans. *Science* **348**, 648-60 (2015).
42. Slowikowski, K., Hu, X. & Raychaudhuri, S. SNPsea: an algorithm to identify cell types, tissues and pathways affected by risk loci. *Bioinformatics* **30**, 2496-7 (2014).

43. Sanuki, R., Omori, Y., Koike, C., Sato, S. & Furukawa, T. Panky, a novel photoreceptor-specific ankyrin repeat protein, is a transcriptional cofactor that suppresses CRX-regulated photoreceptor genes. *FEBS Lett* **584**, 753-8 (2010).
44. Medzikovic, L., de Vries, C.J.M. & de Waard, V. NR4A nuclear receptors in cardiac remodeling and neurohormonal regulation. *Trends Cardiovasc Med* **29**, 429-437 (2019).
45. Comuzzie, A.G. *et al.* Novel genetic loci identified for the pathophysiology of childhood obesity in the Hispanic population. *PLoS One* **7**, e51954 (2012).
46. Willer, C.J. *et al.* Six new loci associated with body mass index highlight a neuronal influence on body weight regulation. *Nat Genet* **41**, 25-34 (2009).
47. Teng, X. *et al.* KCTD: A new gene family involved in neurodevelopmental and neuropsychiatric disorders. *CNS Neurosci Ther* **25**, 887-902 (2019).
48. Eder, P. *et al.* Phospholipase C-dependent control of cardiac calcium homeostasis involves a TRPC3-NCX1 signaling complex. *Cardiovasc Res* **73**, 111-9 (2007).
49. Dabertrand, F., Nelson, M.T. & Brayden, J.E. Ryanodine receptors, calcium signaling, and regulation of vascular tone in the cerebral parenchymal microcirculation. *Microcirculation* **20**, 307-16 (2013).
50. Kashef, F. *et al.* Ankyrin-B protein in heart failure: identification of a new component of metazoan cardioprotection. *J Biol Chem* **287**, 30268-81 (2012).
51. Vicario, N. *et al.* Connexins in the Central Nervous System: Physiological Traits and Neuroprotective Targets. *Front Physiol* **8**, 1060 (2017).
52. Andersen, J.L. *et al.* Identification of the first small-molecule ligand of the neuronal receptor sortilin and structure determination of the receptor-ligand complex. *Acta Crystallogr D Biol Crystallogr* **70**, 451-60 (2014).
53. Zheng, J.S. *et al.* Genome-wide contribution of genotype by environment interaction to variation of diabetes-related traits. *PLoS One* **8**, e77442 (2013).
54. Sandhu, M.S. *et al.* LDL-cholesterol concentrations: a genome-wide association study. *Lancet* **371**, 483-91 (2008).
55. Willer, C.J. *et al.* Discovery and refinement of loci associated with lipid levels. *Nat Genet* **45**, 1274-1283 (2013).
56. Pickrell, J.K. *et al.* Detection and interpretation of shared genetic influences on 42 human traits. *Nat Genet* **48**, 709-17 (2016).
57. Lambert, J.C. *et al.* Genome-wide haplotype association study identifies the FRMD4A gene as a risk locus for Alzheimer's disease. *Mol Psychiatry* **18**, 461-70 (2013).
58. Schizophrenia Working Group of the Psychiatric Genomics, C. Biological insights from 108 schizophrenia-associated genetic loci. *Nature* **511**, 421-7 (2014).
59. Watanabe, K., Taskesen, E., van Bochoven, A. & Posthuma, D. Functional mapping and annotation of genetic associations with FUMA. *Nat Commun* **8**, 1826 (2017).
60. Wang, Q., Xi, B., Liu, M., Zhang, Y. & Fu, M. Short sleep duration is associated with hypertension risk among adults: a systematic review and meta-analysis. *Hypertens Res* **35**, 1012-8 (2012).
61. Baron, K.G. & Reid, K.J. Circadian misalignment and health. *Int Rev Psychiatry* **26**, 139-54 (2014).
62. Douma, L.G. & Gumz, M.L. Circadian clock-mediated regulation of blood pressure. *Free Radic Biol Med* **119**, 108-114 (2018).
63. Nikolaeva, S. *et al.* The circadian clock modulates renal sodium handling. *J Am Soc Nephrol* **23**, 1019-26 (2012).
64. Adeva-Andany, M.M., Perez-Felpe, N., Fernandez-Fernandez, C., Donapetry-Garcia, C. & Pazos-Garcia, C. Liver glucose metabolism in humans. *Biosci Rep* **36**(2016).
65. Cascone, T. *et al.* Increased Tumor Glycolysis Characterizes Immune Resistance to Adoptive T Cell Therapy. *Cell Metab* **27**, 977-987 e4 (2018).

66. Xi, B., He, D., Zhang, M., Xue, J. & Zhou, D. Short sleep duration predicts risk of metabolic syndrome: a systematic review and meta-analysis. *Sleep Med Rev* **18**, 293-7 (2014).
67. Segovia, J. & Zarco, N. Gas1 is a pleiotropic regulator of cellular functions: from embryonic development to molecular actions in cancer gene therapy. *Mini Rev Med Chem* **14**, 1139-47 (2014).
68. Zarco, N. *et al.* Growth arrest specific 1 (GAS1) is abundantly expressed in the adult mouse central nervous system. *J Histochem Cytochem* **61**, 731-48 (2013).
69. Benjamin, E.J. *et al.* Heart Disease and Stroke Statistics-2019 Update: A Report From the American Heart Association. *Circulation* **139**, e56-e528 (2019).
70. Nunes, J. *et al.* Sleep duration among black and white Americans: results of the National Health Interview Survey. *J Natl Med Assoc* **100**, 317-22 (2008).
71. Hale, L. & Do, D.P. Racial differences in self-reports of sleep duration in a population-based study. *Sleep* **30**, 1096-103 (2007).
72. Barfield, R. *et al.* Epigenome-wide association analysis of daytime sleepiness in the Multi-Ethnic Study of Atherosclerosis reveals African-American-specific associations. *Sleep* (2019).
73. Lindhorst, J., Alexander, N., Blignaut, J. & Rayner, B. Differences in hypertension between blacks and whites: an overview. *Cardiovasc J Afr* **18**, 241-7 (2007).
74. Delto, C.F. *et al.* The LisH motif of muskelin is crucial for oligomerization and governs intracellular localization. *Structure* **23**, 364-73 (2015).
75. Heisler, F.F. *et al.* Muskelin regulates actin filament- and microtubule-based GABA(A) receptor transport in neurons. *Neuron* **70**, 66-81 (2011).
76. Ogawa, Y. *et al.* Elavl3 is essential for the maintenance of Purkinje neuron axons. *Sci Rep* **8**, 2722 (2018).
77. Jackson, C.L., Patel, S.R., Jackson, W.B., 2nd, Lutsey, P.L. & Redline, S. Agreement between self-reported and objectively measured sleep duration among white, black, Hispanic, and Chinese adults in the United States: Multi-Ethnic Study of Atherosclerosis. *Sleep* **41**(2018).
78. Silva, G.E. *et al.* Relationship between reported and measured sleep times: the sleep heart health study (SHHS). *J Clin Sleep Med* **3**, 622-30 (2007).
79. Nagai, M., Hoshida, S. & Kario, K. Sleep duration as a risk factor for cardiovascular disease- a review of the recent literature. *Curr Cardiol Rev* **6**, 54-61 (2010).
80. Lavange, L.M. *et al.* Sample design and cohort selection in the Hispanic Community Health Study/Study of Latinos. *Ann Epidemiol* **20**, 642-9 (2010).
81. Winkler, T.W. *et al.* Quality control and conduct of genome-wide association meta-analyses. *Nat Protoc* **9**, 1192-212 (2014).
82. Aulchenko, Y.S., Struchalin, M.V. & van Duijn, C.M. ProbABEL package for genome-wide association analysis of imputed data. *BMC Bioinformatics* **11**, 134 (2010).
83. Zeileis, A. Object-oriented computation of sandwich estimators. (2006).
84. Winkler, T.W. *et al.* EasyStrata: evaluation and visualization of stratified genome-wide association meta-analysis data. *Bioinformatics* **31**, 259-61 (2015).
85. Boyle, A.P. *et al.* Annotation of functional variation in personal genomes using RegulomeDB. *Genome Res* **22**, 1790-7 (2012).
86. Ramos, E.M. *et al.* Phenotype–Genotype Integrator (PheGenI): synthesizing genome-wide association study (GWAS) data with existing genomic resources. *European Journal of Human Genetics* **22**, 144-147 (2014).
87. Hamosh, A., Scott, A.F., Amberger, J.S., Bocchini, C.A. & McKusick, V.A. Online Mendelian Inheritance in Man (OMIM), a knowledgebase of human genes and genetic disorders. *Nucleic Acids Res* **33**, D514-7 (2005).

88. Cotto, K.C. *et al.* DGldb 3.0: a redesign and expansion of the drug-gene interaction database. *Nucleic Acids Res* **46**, D1068-D1073 (2018).
89. de Leeuw, C.A., Mooij, J.M., Heskes, T. & Posthuma, D. MAGMA: generalized gene-set analysis of GWAS data. *PLoS Comput Biol* **11**, e1004219 (2015).
90. Liberzon, A. *et al.* Molecular signatures database (MSigDB) 3.0. *Bioinformatics* **27**, 1739-40 (2011).

**Fig. 1.** Study overview.

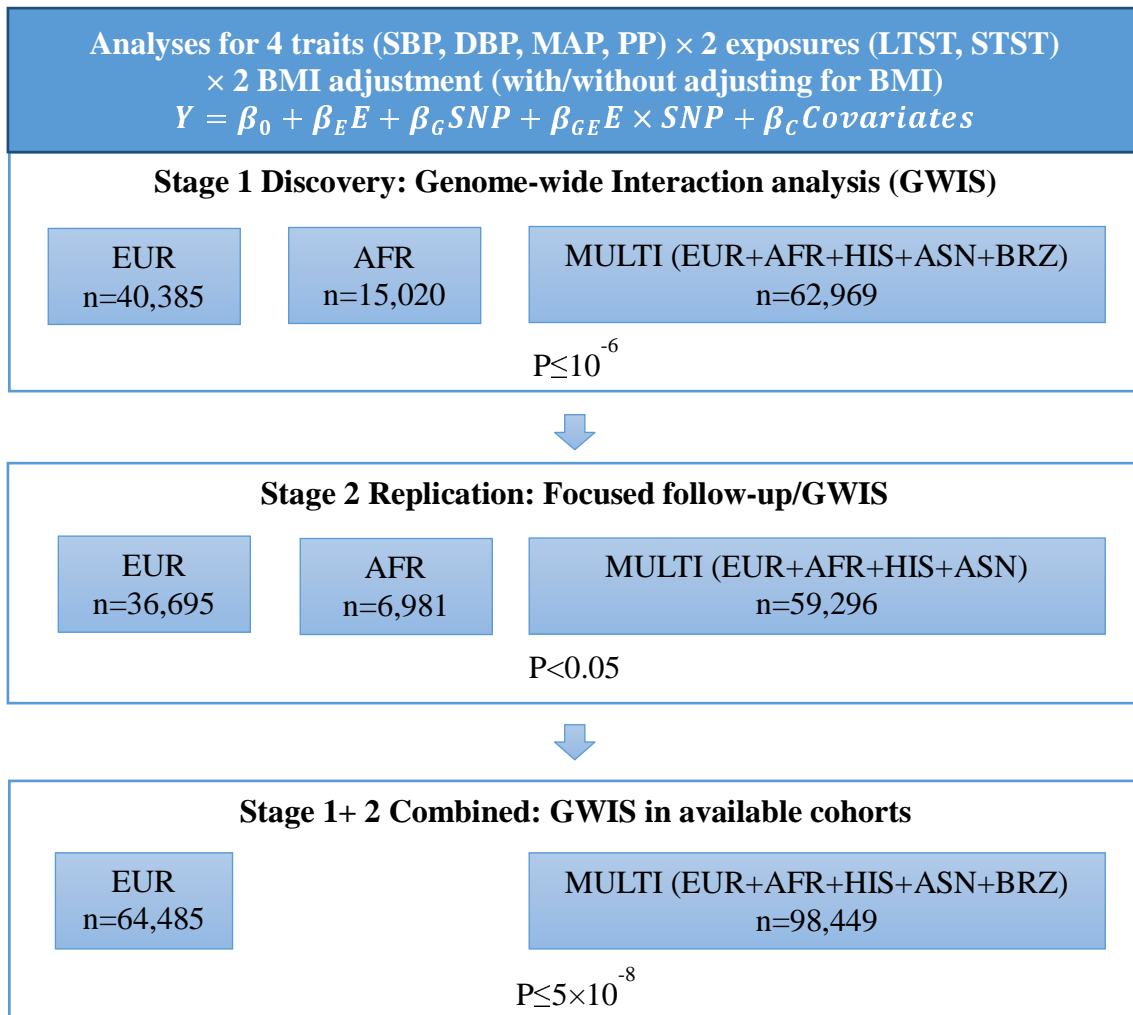

**Fig. 2.** Forest plots of 3 replicated novel loci identified in genome-wide gene- sleep 1df interaction analyses in multi-ancestry population.

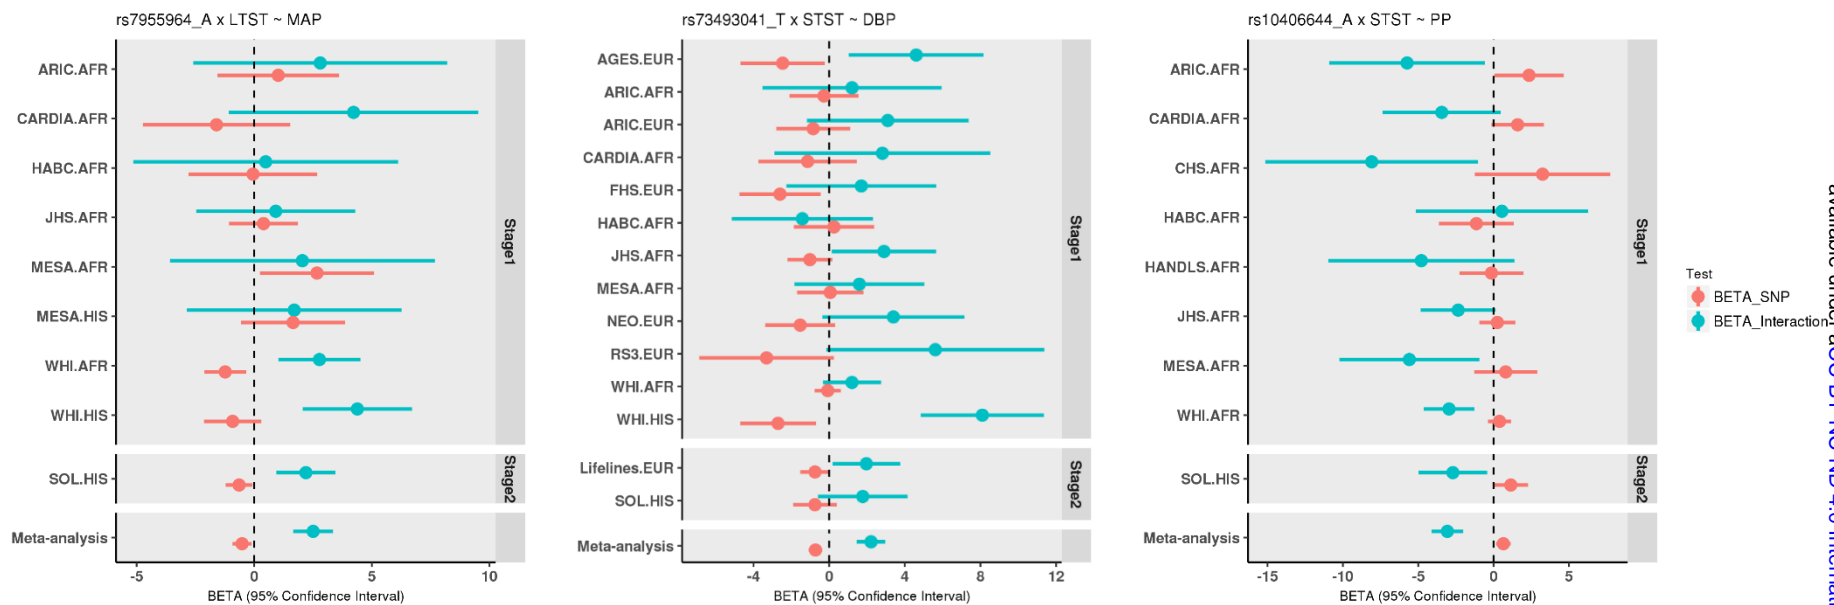

**Table 1.** Replicated novel BP loci identified incorporating gene-sleep interactions with and without BMI adjustment.

| Exposure | rsID       | Gene(s)                  | Chr: position (Build 37) | Alleles (E/A) | EAF   | Trait | Stage | BMI adjustment | N           | $\beta_{SNP}$ | SE <sub>SNP</sub> | $\beta_{Int}$ | SE <sub>Int</sub> | P <sub>Joint</sub>    | P <sub>Int</sub>            |                              |
|----------|------------|--------------------------|--------------------------|---------------|-------|-------|-------|----------------|-------------|---------------|-------------------|---------------|-------------------|-----------------------|-----------------------------|------------------------------|
| LTST     | rs7955964  | <i>FIGNL2, ANKRD33</i>   | 12:52281279              | A/T           | 0.896 | MAP   | 1     | Without BMI    | 18583       | -0.400        | 0.290             | 2.711         | 0.582             | 1.75×10 <sup>-5</sup> | 1.34×10 <sup>-6</sup>       |                              |
|          |            |                          |                          |               |       |       |       | with BMI       | 18583       | -0.462        | 0.279             | 2.768         | 0.546             | 2.48×10 <sup>-6</sup> | 2.10×10 <sup>-7</sup>       |                              |
|          |            |                          |                          |               |       |       |       | 2              | Without BMI | 12335         | -0.621            | 0.289         | 2.163             | 0.632                 | 2.52×10 <sup>-3</sup>       | 5.49×10 <sup>-4</sup>        |
|          |            |                          |                          |               |       |       |       |                | with BMI    | 12327         | -0.519            | 0.281         | 2.210             | 0.613                 | 1.72×10 <sup>-3</sup>       | 2.66×10 <sup>-4</sup>        |
|          |            |                          |                          |               |       |       |       | 1+2            | Without BMI | 29985         | -0.517            | 0.208         | 2.505             | 0.433                 | 1.11×10 <sup>-7</sup>       | <b>4.40×10<sup>-9</sup></b>  |
|          |            |                          |                          |               |       |       |       |                | with BMI    | 29957         | -0.500            | 0.201         | 2.577             | 0.413                 | <b>6.74×10<sup>-9</sup></b> | <b>2.94×10<sup>-10</sup></b> |
| STST     | rs73493041 | <i>SNORA26, C9orf170</i> | 9:89849304               | T/C           | 0.959 | DBP   | 1     | Without BMI    | 36858       | -0.725        | 0.229             | 2.336         | 0.471             | 4.65×10 <sup>-6</sup> | 3.6×10 <sup>-7</sup>        |                              |
|          |            |                          |                          |               |       |       |       | with BMI       | 36858       | -0.723        | 0.219             | 2.235         | 0.456             | 5.16×10 <sup>-6</sup> | 5.18×10 <sup>-7</sup>       |                              |
|          |            |                          |                          |               |       |       |       | 2              | Without BMI | 24413         | -0.763            | 0.321         | 1.888             | 0.705                 | 5.44×10 <sup>-3</sup>       | 9.43×10 <sup>-3</sup>        |
|          |            |                          |                          |               |       |       |       |                | with BMI    | 24385         | -0.704            | 0.335         | 1.875             | 0.704                 | 1.09×10 <sup>-2</sup>       | 1.27×10 <sup>-2</sup>        |
|          |            |                          |                          |               |       |       |       | 1+2            | Without BMI | 61271         | -0.724            | 0.185         | 2.213             | 0.387                 | <b>3.62×10<sup>-8</sup></b> | <b>1.30×10<sup>-8</sup></b>  |
|          |            |                          |                          |               |       |       |       |                | with BMI    | 61243         | -0.709            | 0.182         | 2.132             | 0.381                 | 7.15×10 <sup>-8</sup>       | <b>2.58×10<sup>-8</sup></b>  |
|          | rs10406644 | <i>KCTD15, LSM14A</i>    | 19:34595645              | A/G           | 0.095 | PP    | 1     | Without BMI    | 15021       | 0.542         | 0.275             | -3.194        | 0.605             | 1.26×10 <sup>-6</sup> | 1.35×10 <sup>-7</sup>       |                              |
|          |            |                          |                          |               |       |       |       | with BMI       | 12921       | 0.565         | 0.306             | -3.382        | 0.677             | 5.23×10 <sup>-6</sup> | 4.81×10 <sup>-7</sup>       |                              |
|          |            |                          |                          |               |       |       |       | 2              | Without BMI | 11401         | 1.142             | 0.587         | -2.702            | 1.163                 | 4.59×10 <sup>-2</sup>       | 2.02×10 <sup>-2</sup>        |
|          |            |                          |                          |               |       |       |       |                | with BMI    | 11373         | 1.102             | 0.582         | -2.533            | 1.155                 | 6.08×10 <sup>-2</sup>       | 2.83×10 <sup>-2</sup>        |
|          |            |                          |                          |               |       |       |       | 1+2            | Without BMI | 26422         | 0.648             | 0.249         | -3.067            | 0.536                 | 1.39×10 <sup>-7</sup>       | <b>7.59×10<sup>-9</sup></b>  |
|          |            |                          |                          |               |       |       |       |                | with BMI    | 24294         | 0.678             | 0.271         | -3.135            | 0.584                 | 8.56×10 <sup>-7</sup>       | <b>4.35×10<sup>-8</sup></b>  |
